# Supplementary material
Source: publisher figshare collection journal article supplement (https://acs.figshare.com/ndownloader/files/5191792)

## Lattice-Strain Directed Synthesis of Anatase TiO<sub>2</sub> Single-Crystal Microplatelet Arrays on $\alpha$ -MoO<sub>3</sub> (010) Template

Hua Gui Yang and Hua Chun Zeng\*

*Department of Chemical and Environmental Engineering, Faculty of Engineering*

*National University of Singapore, 10 Kent Ridge Crescent, Singapore 119260*

### Supporting Information 1:

XRD pattern of anatase TiO<sub>2</sub> microplatelets grown on the (010) surface of  $\alpha$ -MoO<sub>3</sub> template: (a) anatase TiO<sub>2</sub> microplatelets (peaks indicated with an asterisk) on the (010) surface of  $\alpha$ -MoO<sub>3</sub>, and (b) the (010) surface of  $\alpha$ -MoO<sub>3</sub> for reference. Experimental conditions: [TiF<sub>4</sub>] = 4.0 mM (30 mL), TiF<sub>4</sub>/EDTA molar ratio = 2.234; at 200°C for 4 h.

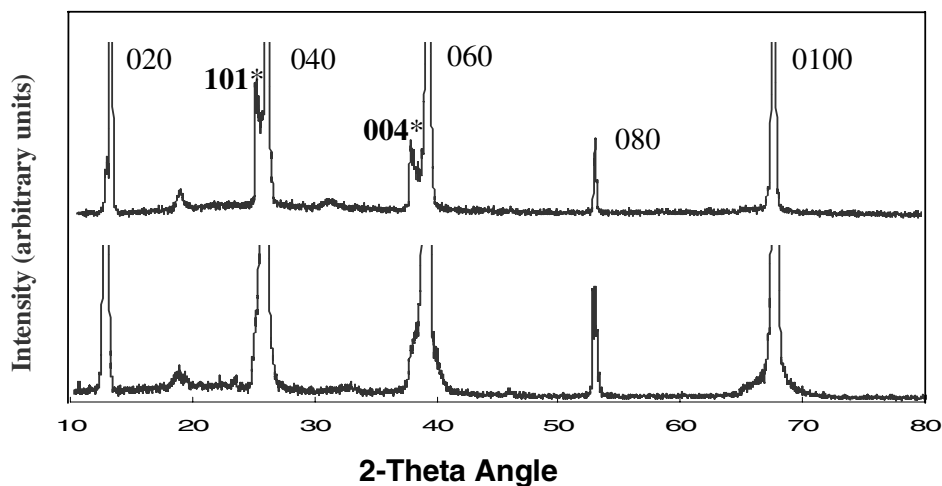

### Supporting Information 2:

EXD results for anatase  $\text{TiO}_2$  microplatelets grown on the (010) surface of  $\alpha\text{-MoO}_3$  template. The Pt signal is generated from Pt coating used for the measurement. Experimental conditions:  $[\text{TiF}_4] = 1.33 \text{ mM}$  (30 mL),  $\text{TiF}_4/\text{EDTA}$  molar ratio = 0.75; at  $200^\circ\text{C}$  for 6 h.

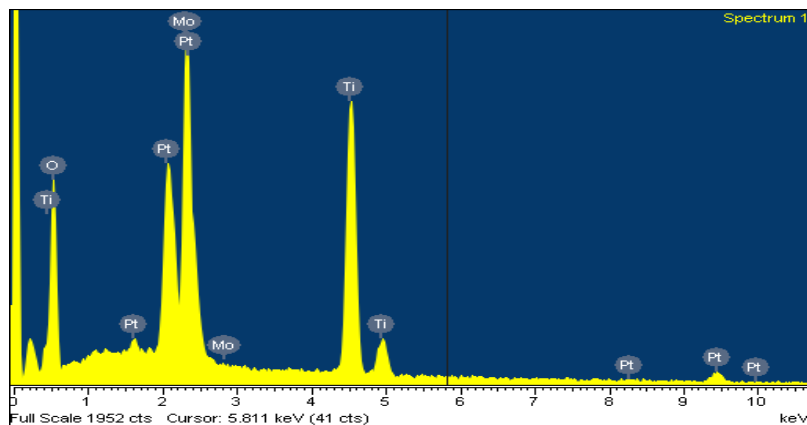

### Supporting Information 3:

(i) SEM image for bipyramidal microcrystals of anatase  $\text{TiO}_2$  grown without  $\alpha\text{-MoO}_3$  template. [Some smaller crystallites with the {001} surfaces are indicated with arrows.](#) Experimental conditions:  $[\text{TiF}_4] = 1.33 \text{ mM}$  (30 mL),  $\text{TiF}_4/\text{EDTA}$  molar ratio = 0.75; at  $170^\circ\text{C}$  for 10 h.

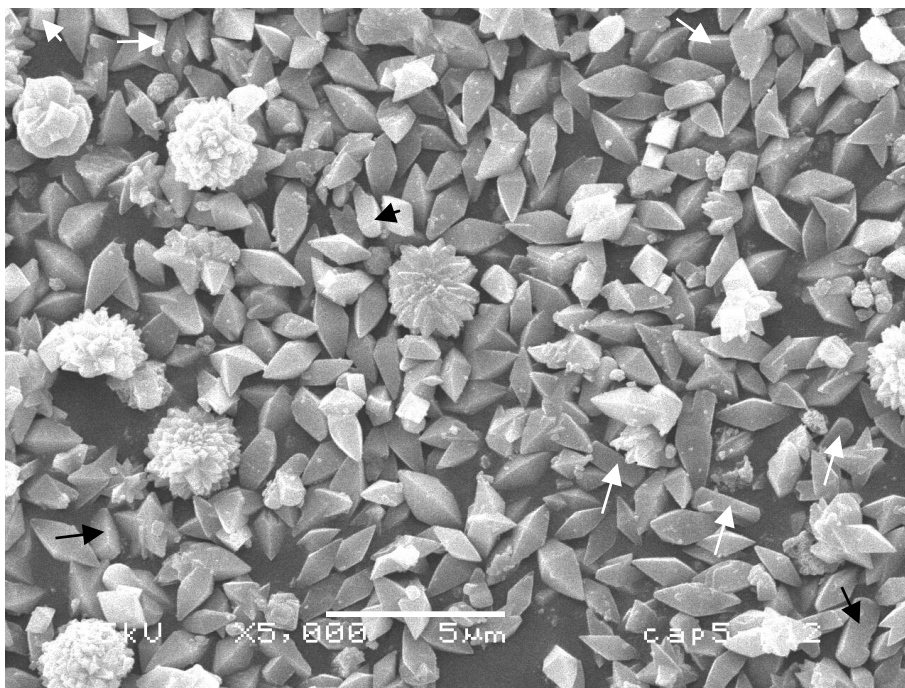

(ii) TEM image and ED pattern of the smaller  $\text{TiO}_2$  crystallites with the  $\{001\}$  surfaces. Experimental conditions:  $[\text{TiF}_4] = 1.33 \text{ mM}$  (30 mL),  $\text{TiF}_4/\text{EDTA}$  molar ratio = 0.75; at  $170^\circ\text{C}$  for 10 h.

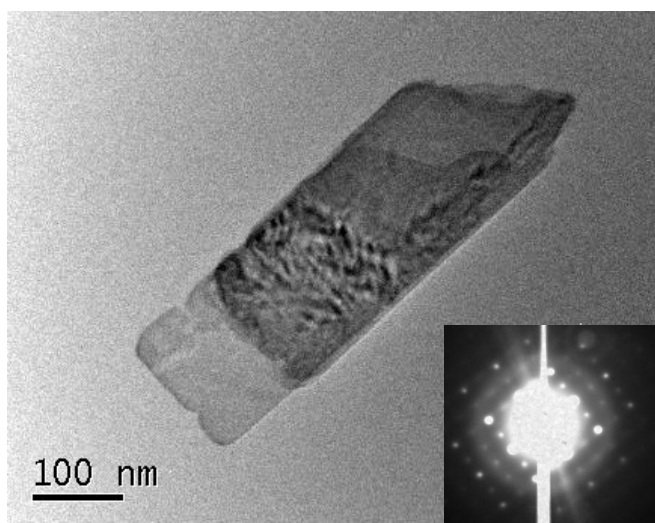

#### Supporting Information 4:

(i) TEM image and ED pattern for  $[001]$  oriented anatase  $\text{TiO}_2$  microcrystals (together with bipyramidal microcrystals) grown without  $\alpha\text{-MoO}_3$  template. Experimental conditions:  $[\text{TiF}_4] = 1.33 \text{ mM}$  (30 mL),  $\text{TiF}_4/\text{EDTA}$  molar ratio = 0.72; at  $150^\circ\text{C}$  for 25 h. It should be mentioned that without adding EDTA,  $\{001\}$  facets cannot be observed, although the conditions here (as well as those in SI-3) are not exactly identical to Figures 2 to 4 in the main text.

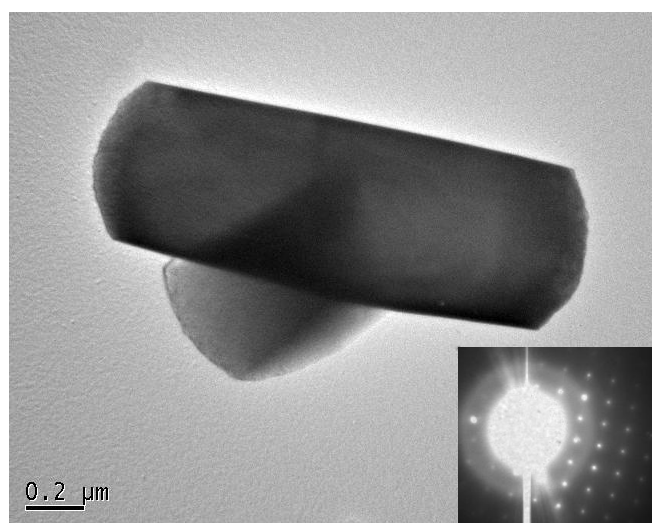

(ii) TEM images and ED pattern for [001] oriented anatase  $\text{TiO}_2$  crystallites (together with some bipyramidal microcrystals) grown without  $\alpha\text{-MoO}_3$  template. Note that population of bipyramidal microcrystals has been significantly reduced. Experimental conditions:  $[\text{TiF}_4] = 1.33 \text{ mM}$  (30 mL),  $\text{TiF}_4/\text{EDTA}$  molar ratio = 0.72; at  $200^\circ\text{C}$  for 5 h.

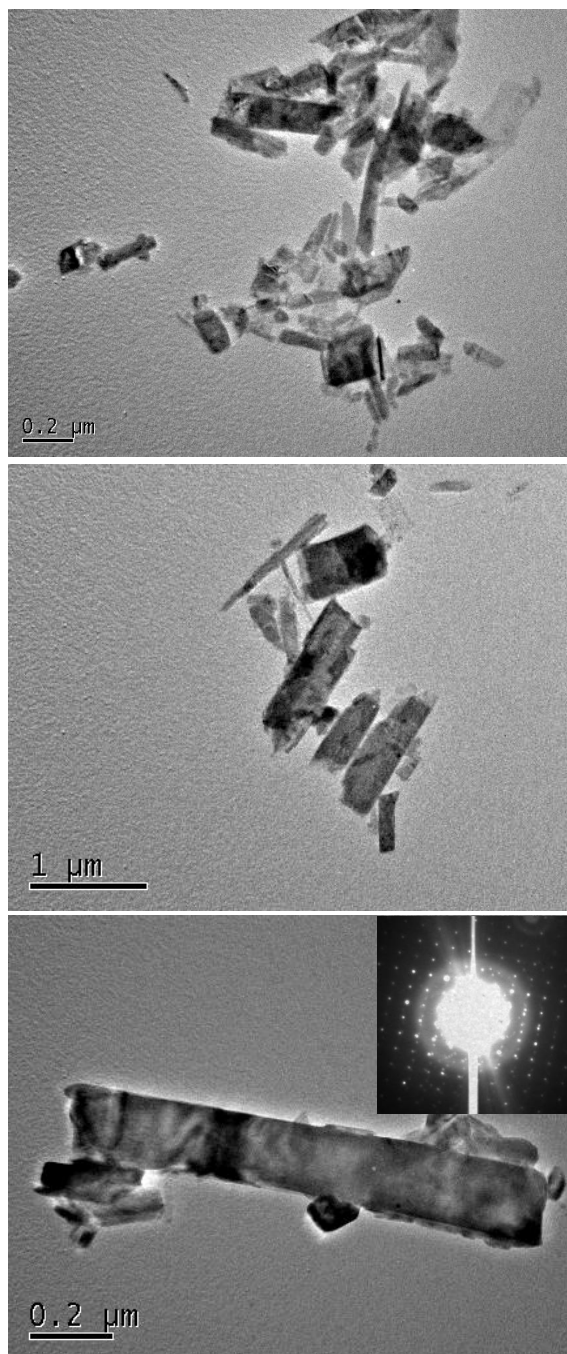

**Supporting Information 5:**

TEM image and ED pattern for anatase  $\text{TiO}_2$  overlayers without using EDTA salt in synthesis. Experimental conditions:  $[\text{TiF}_4] = 0.8 \text{ mM}$  (30 mL), 0.1 g of  $\alpha\text{-MoO}_3$  nanorods; at  $200^\circ\text{C}$  for 3 h. After synthesis, the  $\alpha\text{-MoO}_3$  nanorods templates were dissolved in 1.0 M NaOH solution and washed with deionized water.

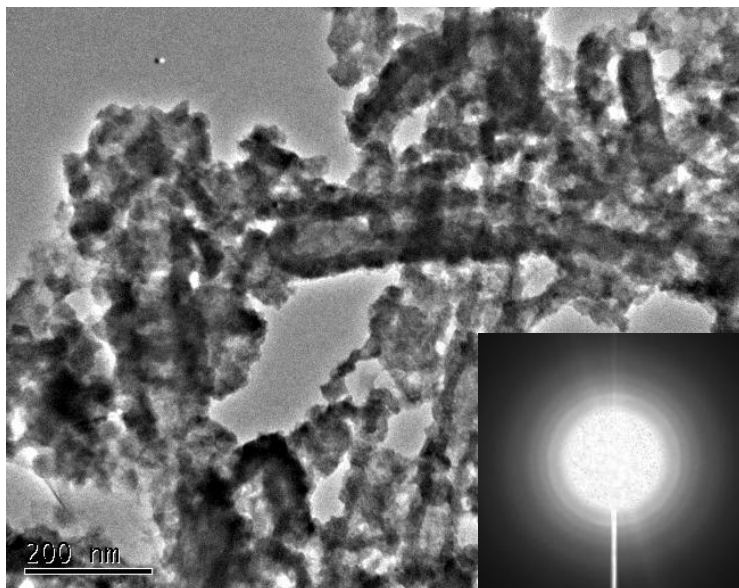

Supplement: Supplementary file 1 [file 5191792]
